# Supplementary material for: A new mfj-type metal–organic framework constructed from a methoxyl derived V-shaped ligand and its H2, CO2 and CH4 adsorption properties
Source: Royal Society of Chemistry journal article supplement (doi:10.1039/c7ra02122d), 2017-01-01
Supplement: c7ra02122d1.pdf [file c7ra02122d1.pdf]

## Electronic Supplementary Information (ESI)

# A new *mjf*-type Metal-Organic Framework Constructed from Methoxyl Derived V-shaped Ligand and Its H<sub>2</sub>, CO<sub>2</sub> and CH<sub>4</sub> Adsorption Properties

Liting Du<sup>a,c</sup>, Zhiyong Lu<sup>\*b</sup>, Li Xu<sup>c</sup> and Jinchi Zhang<sup>\*a</sup>

<sup>a</sup> Collaborative Innovation Center of Sustainable Forestry in Southern China of Jiangsu Province, Nanjing Forestry University, Nanjing, 210037, China.

Email: zhang8811@njfu.edu.cn.

<sup>b</sup> College of Mechanics and Materials, Hohai University, Nanjing 210098, China.

Email: johnlook1987@gmail.com.

<sup>c</sup> Advanced Analysis and Testing Center, Nanjing Forestry University, Nanjing 210037, China.

### Table of contents

Section S1. Crystal Structure

Section S2. BET Surface Area Analysis

Section S3. Langmuir Surface Area Analysis

Section S4. Estimation of the Isothermic Heats of Gas Adsorption

Section S5. IAST adsorption selectivity calculation

Section S6. Thermal Stability Test

References

## SECTION S1. Crystal structure

Table S1. Crystal Data for NJFU-3.

|                                                            | NJFU-3                                                          |
|------------------------------------------------------------|-----------------------------------------------------------------|
| CCDC number                                                | 1532967                                                         |
| Empirical formula                                          | C <sub>69</sub> H <sub>36</sub> Cu <sub>6</sub> O <sub>33</sub> |
| Formula weight                                             | 1774.28                                                         |
| crystal system                                             | orthorhombic                                                    |
| Space group                                                | <i>Cmc2<sub>1</sub></i>                                         |
| <i>a</i> [Å]                                               | 24.742(3)                                                       |
| <i>b</i> [Å]                                               | 33.475(3)                                                       |
| <i>c</i> [Å]                                               | 18.4621(19)                                                     |
| $\alpha$ [deg]                                             | 90                                                              |
| $\beta$ [deg]                                              | 90                                                              |
| $\gamma$ [deg]                                             | 90                                                              |
| <i>V</i> [Å <sup>3</sup> ]                                 | 15291(3)                                                        |
| <i>Z</i>                                                   | 4                                                               |
| <i>T</i> [K]                                               | 296(2)                                                          |
| $\rho_{\text{calc}}$ [g cm <sup>-3</sup> ]                 | 0.771                                                           |
| R1, wR2 <sup>a</sup> [ <i>I</i> > 2 $\sigma$ ( <i>I</i> )] | 0.0729; 0.1842                                                  |
| R1, wR2 <sup>a</sup> [all data]                            | 0.1022; 0.1967                                                  |

<sup>a</sup> R1 =  $\sum ||F_o| - |F_c|| / \sum |F_o|$ ; wR2 =  $[\sum w(F_o^2 - F_c^2)^2 / \sum w(F_o^2)]^{1/2}$

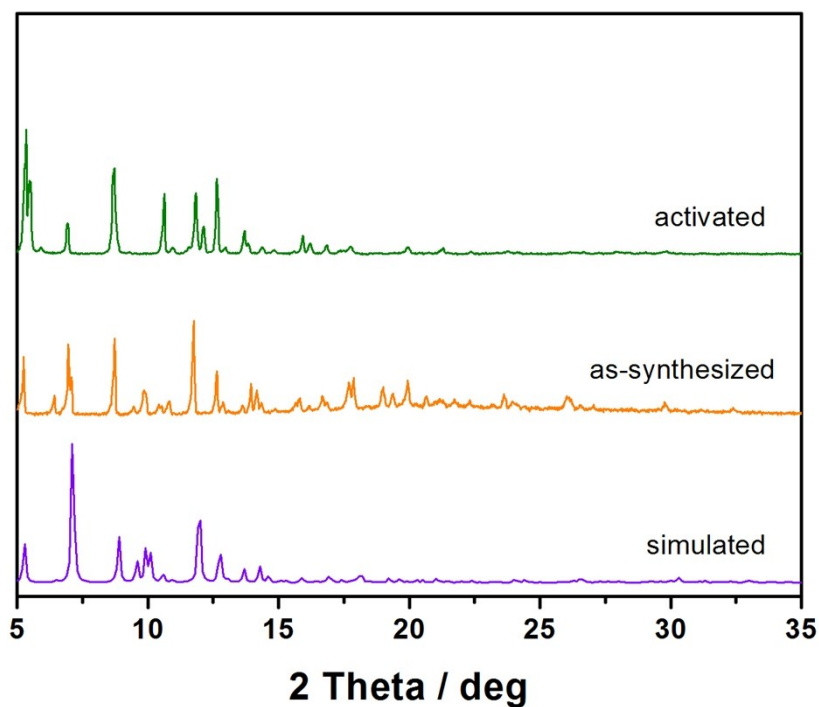

Figure S1. PXRD patterns of NJFU-3.

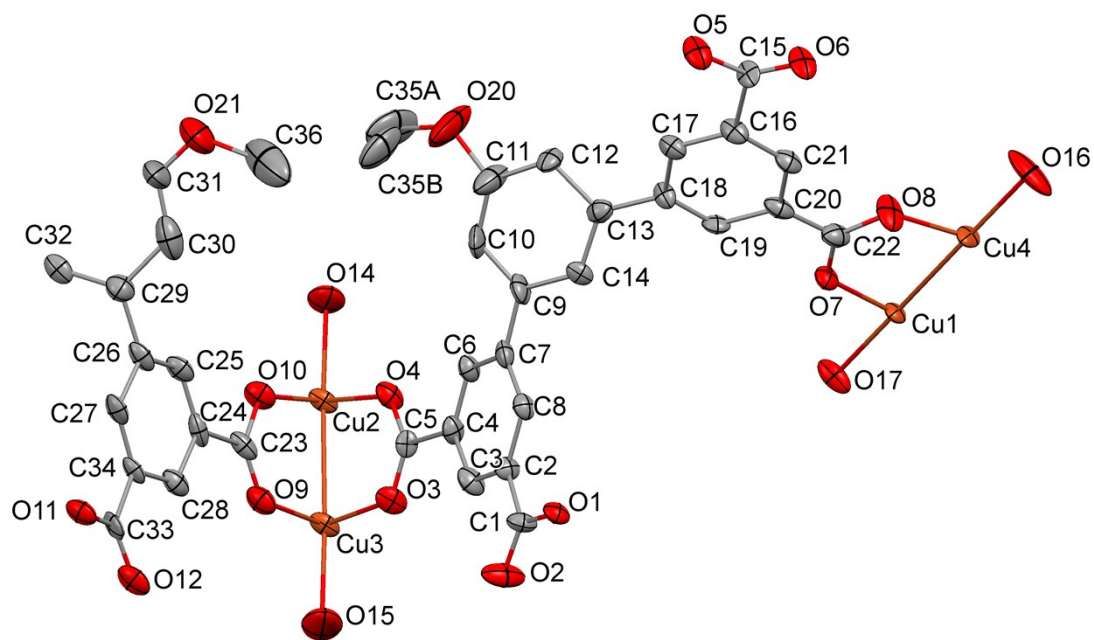

Figure S2. The asymmetric structural unit of NJFU-3.

## SECTION S2. BET Surface Area Analysis

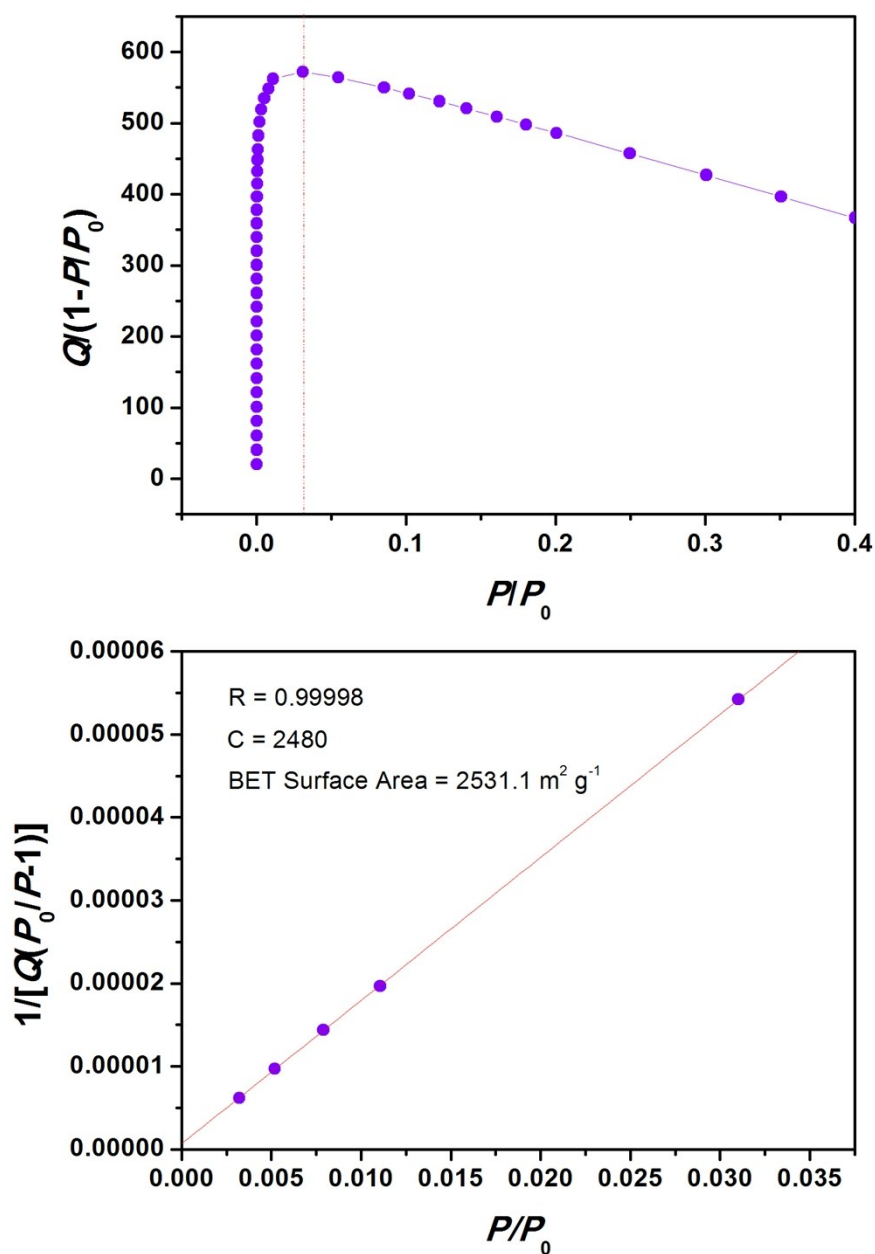

Figure S3. Top:  $Q(1-P/P_0)$  vs.  $P/P_0$  for simulated  $\text{N}_2$  isotherm in NJFU-3. Only the range below  $P/P_0 = 0.04$  satisfies the first consistency criterion for application of the BET theory. Bottom: Plot of the linear region for the BET equation, which satisfies the second criterion for application of the BET theory.

### SECTION S3. Langmuir Surface Area Analysis

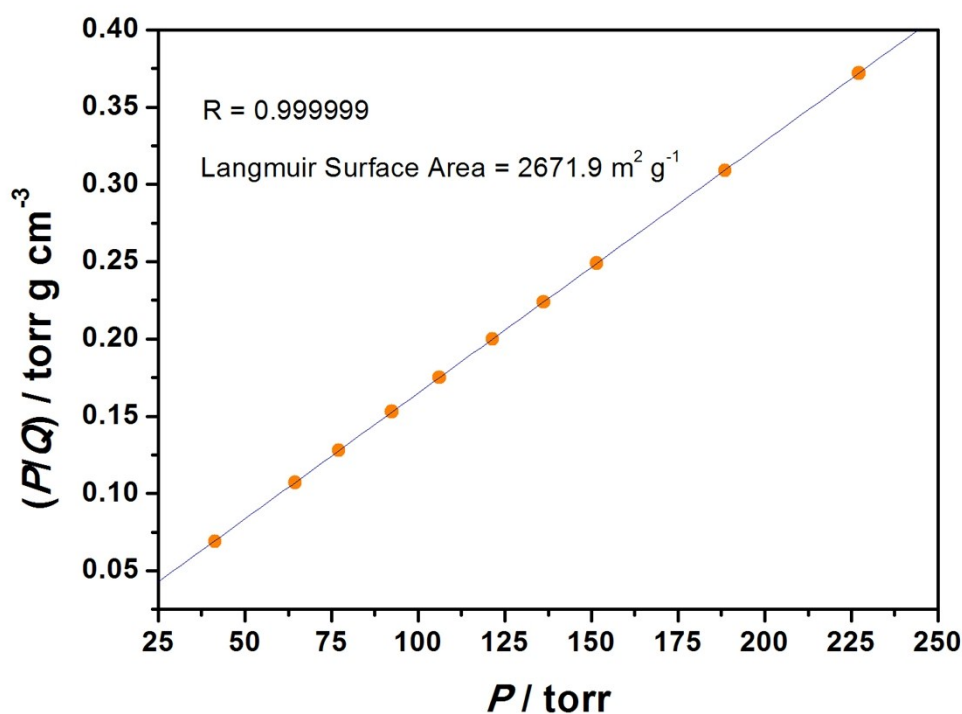

Figure S4. Langmuir equation fitting curve for NJFU-3's N<sub>2</sub> isotherm (adsorption branch data points, P/P<sub>0</sub> = 0.1–0.3).

### SECTION S4. Estimation of the isosteric heats of gas adsorption.

A virial-type expression comprising the temperature-independent parameters  $a_i$  and  $b_i$  was employed to calculate the enthalpies of adsorption for H<sub>2</sub> (at 77 and 87 K) and CO<sub>2</sub> (at 273 and 298 K). The data were fitted using the equation:

$$\ln P = \ln N + 1/T \sum_{i=0}^m a_i N^i + \sum_{i=0}^n b_i N^i \quad (1)$$

Here,  $P$  is the pressure expressed in torr,  $N$  is the amount adsorbed in mmol/g,  $T$  is the temperature in K,  $a_i$  and  $b_i$  are virial coefficients, and  $m$ ,  $n$  represent the number of coefficients required to adequately describe the isotherms ( $m$  and  $n$  were gradually increased until the

contribution of extra added  $a$  and  $b$  coefficients was deemed to be statistically insignificant towards the overall fit, and the average value of the squared deviations from the experimental values was minimized).

$$Q_{st} = -R \sum_{i=0}^m a_i N^i \quad (2)$$

Here,  $Q_{st}$  is the coverage-dependent isosteric heat of adsorption and  $R$  is the universal gas constant.

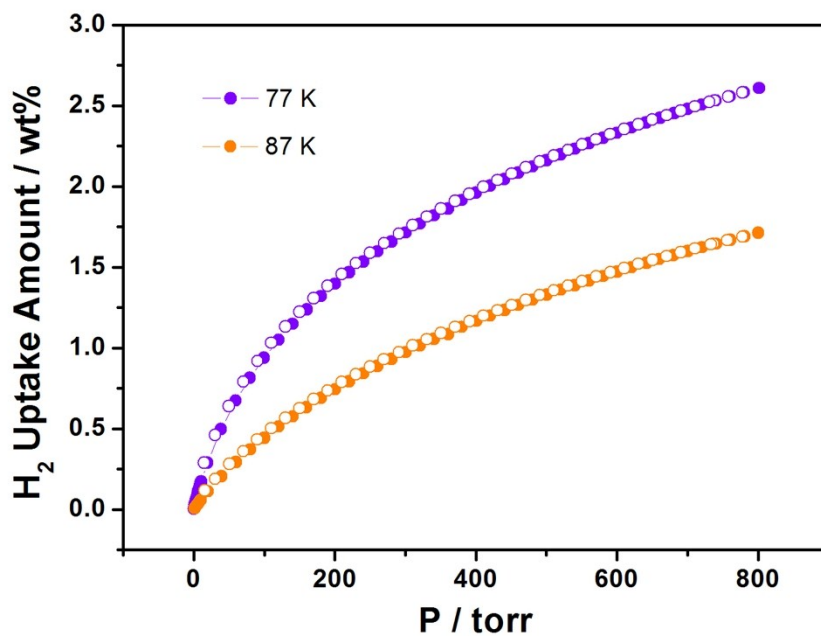

Figure S5. The H<sub>2</sub> adsorption isotherms of NJFU-3 at 77 K and 87 K.

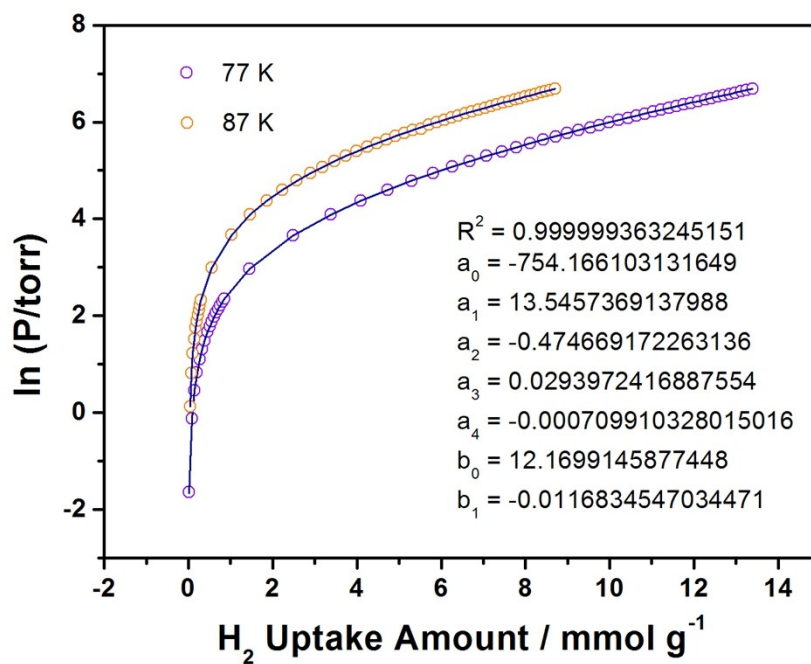

Figure S6. The details of virial equation (solid lines) fitting to the experimental H<sub>2</sub> adsorption data (symbols) for NJFU-3.

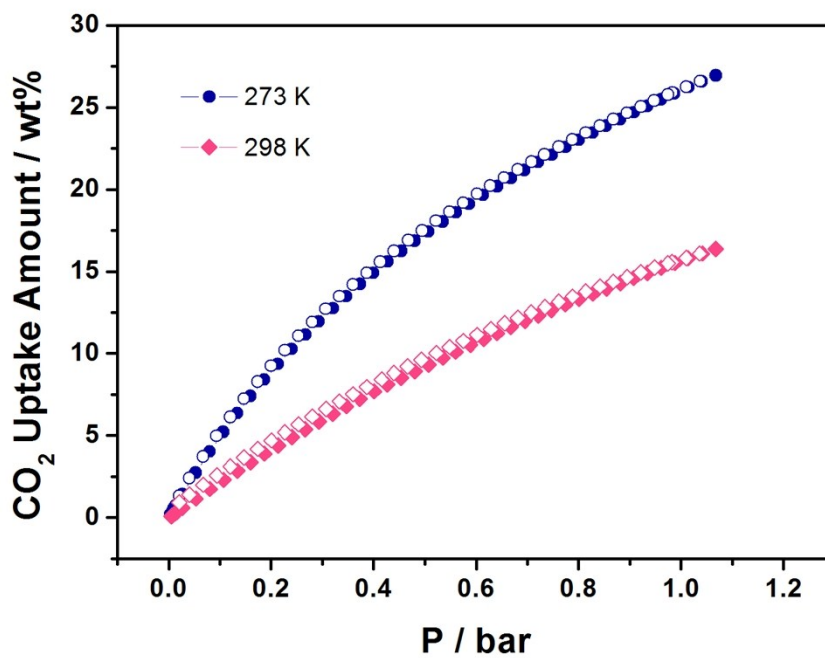

Figure S7. The CO<sub>2</sub> adsorption isotherms of NJFU-3 at 273 K and 298 K.

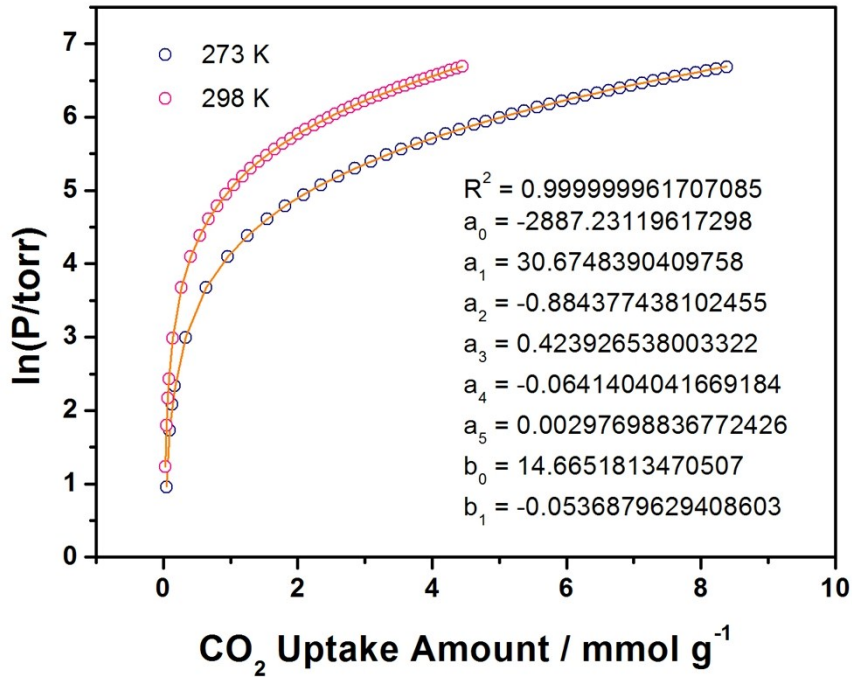

Figure S8. The details of virial equation (solid lines) fitting to the experimental CO<sub>2</sub> adsorption data (symbols) for NJFU-3.

## SECTION S5. IAST adsorption selectivity calculation.

Dual site Langmuir-Freundlich model for CO<sub>2</sub>/CH<sub>4</sub> adsorption isotherms:

$$N = \frac{N_{m,1}b_1p^{1/n_1}}{1+b_1p^{1/n_1}} + \frac{N_{m,2}b_2p^{1/n_2}}{1+b_2p^{1/n_2}}$$

Where  $p$  (unit: KPa) is the pressure of the bulk gas at equilibrium with the adsorbed phase,  $N$  is the adsorption quantity,  $N_{m,1}$  and  $N_{m,2}$  are the saturation capacities of sites 1 and 2,  $b_1$  and  $b_2$  (unit: 1/KPa) are the affinity coefficients of sites 1 and 2, and  $n_1$  and  $n_2$  represent the deviations from an ideal homogeneous surface. Here, the single-component CO<sub>2</sub> and CH<sub>4</sub> adsorption isotherms have been fit to enable the application of IAST in simulating the performance of NJFU-3a under a mixed component gas. The fitting parameters of DSLF equation are listed in Table S2.



**Table S2** Dual site Langmuir-Freundlich fitting parameters for gas adsorption for NJFU-3a.

| Adsorbates              | $N_{m,1}$ | $b_1$     | $1/n_1$ | $N_{m,2}$ | $b_2$    | $1/n_2$ |
|-------------------------|-----------|-----------|---------|-----------|----------|---------|
| CO <sub>2</sub> (273 K) | 64.8928   | 0.0016246 | 0.92159 | 1.7460    | 0.01169  | 1.2662  |
| CH <sub>4</sub> (273 K) | 0.38390   | 0.015170  | 0.99193 | 15.909    | 0.000715 | 1.0430  |

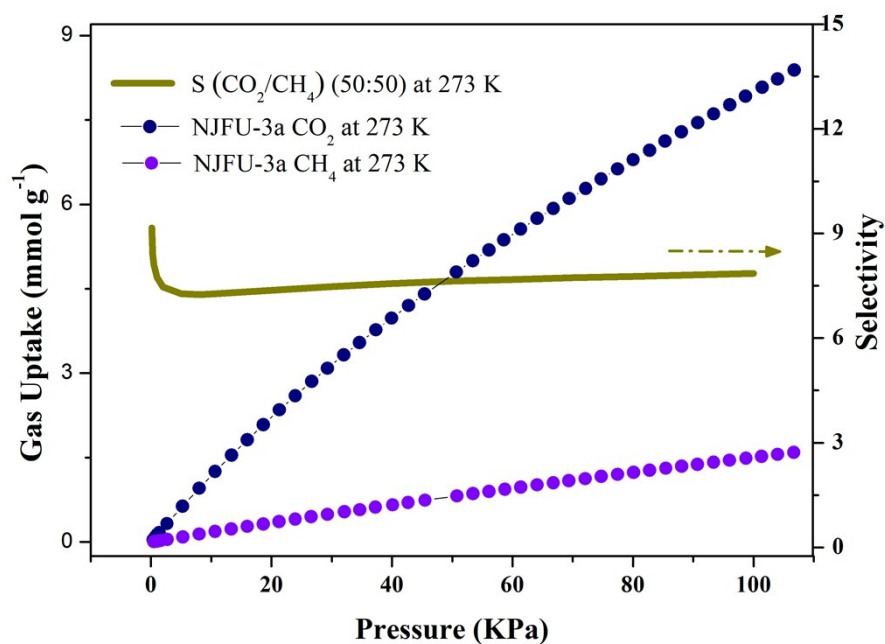

Figure S9. Mixture adsorption isotherms and adsorption selectivity predicted by IAST of NJFU-3a for CO<sub>2</sub> (50%) and CH<sub>4</sub> (50%) at 273 K.

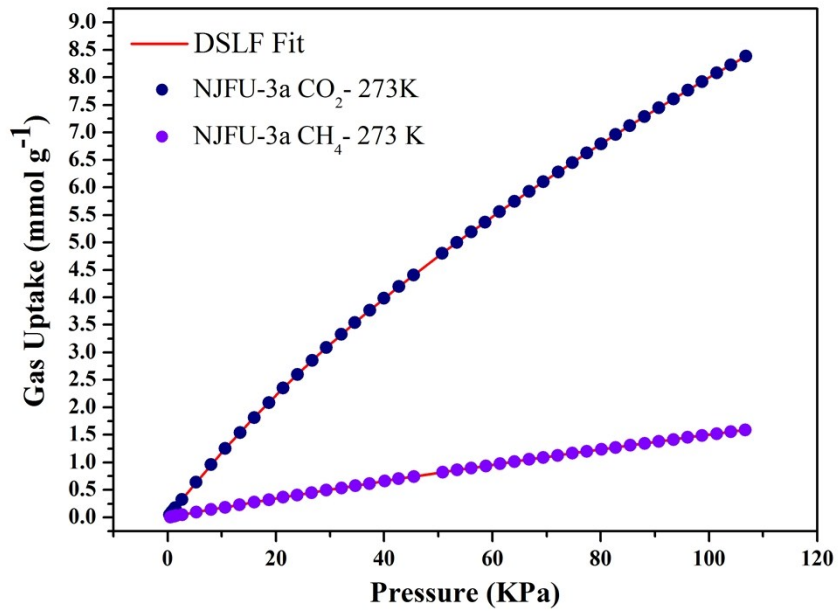

Figure S10. DSLF models fitting for the CO<sub>2</sub> and CH<sub>4</sub> adsorption isotherms of NJFU-3a. Dots are experimental data; lines are fitting curves.

**SECTION S6. Thermal stability.**

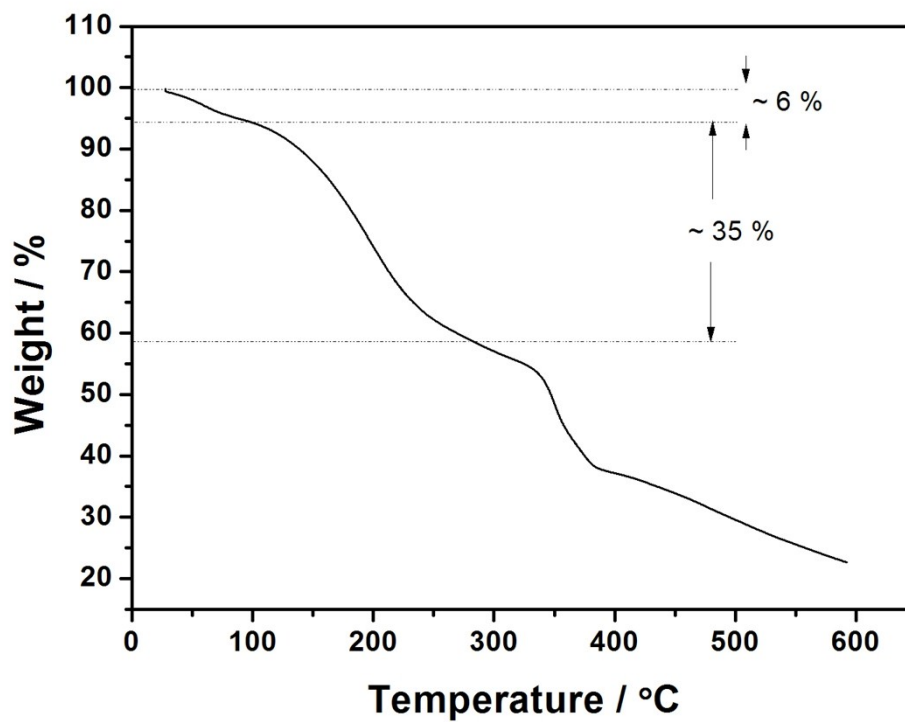

Figure S11. TG curve of NJFU-3.
